# Supplementary material
Source: publisher figshare collection journal article supplement (https://tandf.figshare.com/ndownloader/files/15222056)
Supplement: Supplementary file 1 [file 15222056]

SUPPLEMENTARY MATERIAL

Table 1

*Descriptive measures and correlations among key variables in Montenegro*

|  | 1 | 2 | 3 | 4 | 5 | 6 | 7 | 8 | 9 | 10 | 11 | 12 | 13 | 14 | 15 |
| --- | --- | --- | --- | --- | --- | --- | --- | --- | --- | --- | --- | --- | --- | --- | --- |
| 1. Acceptance gay-lesbian people | - | .46** | .58** | .55** | .31** | .13 | .05 | -.01 | .06 | -.06 | .70** | .18** | .39** | .50** | .26** |
| 2. Acceptance disabled |  | - | .59** | .45** | .64** | .09 | .15* | .02 | -.00 | -.02 | .32** | .28** | .24** | .28** | .31** |
| 3. Acceptance Roma |  |  | - | .68** | .44** | .10 | .18** | .06 | .09 | -.03 | .48** | .26** | .51** | .488** | .28** |
| 4. Acceptance ethnic out-group |  |  |  | - | .36** | .08 | .18** | .07 | .31** | .02 | .51** | .15* | .33** | .72** | .11 |
| 5. Acceptance extremely poor |  |  |  |  | - | .02 | .16* | .10 | .10 | .04 | .23** | .21** | .15* | .15* | .26** |
| 6. Contact with gay-lesbian people |  |  |  |  |  | - | .15* | .13 | .31** | .11 | .14* | .10 | .05 | .09 | .07 |
| 7. Contact with disabled |  |  |  |  |  |  | - | .20** | .26** | .39** | .09 | .06 | .13 | .14* | .13* |
| 8. Contact with Roma |  |  |  |  |  |  |  | - | .29** | .20** | .03 | -.04 | .04 | .03 | -.00 |
| 9. Contact with ethnic out-group |  |  |  |  |  |  |  |  | - | .27** | .11 | .02 | .09 | .28** | -.06 |
| 10. Contact with very poor |  |  |  |  |  |  |  |  |  | - | -.11 | -.13 | -.12 | -.10 | -.08 |
| 11. Trust in gay-lesbian people |  |  |  |  |  |  |  |  |  |  | - | .23** | .40** | .58** | .21** |
| 12. Trust in people with disabilities |  |  |  |  |  |  |  |  |  |  |  | - | .35** | .31** | .61** |
| 13. Trust in Roma people |  |  |  |  |  |  |  |  |  |  |  |  | - | .57** | .42** |
| 14. Trust in ethnic out-group |  |  |  |  |  |  |  |  |  |  |  |  |  | - | .27** |
| 15. Trust in very poor people |  |  |  |  |  |  |  |  |  |  |  |  |  |  | - |
| M | 10.16 | 16.41 | 13.13 | 13.03 | 17.72 | .08 | .68 | .32 | .43 | 1.20 | 5.49 | 7.96 | 5.92 | 6.15 | 8.05 |
| SD | 5.63 | 3.16 | 4.39 | 5.26 | 2.83 | .27 | .75 | .60 | .77 | 1.02 | 2.35 | 1.81 | 1.99 | 2.23 | 1.77 |

* *p* < .05; ** *p* < .01

*Acceptance: on the scale from 4 (min) to 20 (max); Contact: on the scale from 0 to 3*

Table 2

*Descriptive measures and correlations among key variables in Serbia*

|  | 1 | 2 | 3 | 4 | 5 | 6 | 7 | 8 | 9 | 10 | 11 | 12 | 13 | 14 | 15 |
| --- | --- | --- | --- | --- | --- | --- | --- | --- | --- | --- | --- | --- | --- | --- | --- |
| 1. Acceptance gay-lesbian people |  | .32** | .41** | .55** | .27** | .25** | .13* | .14* | .07 | .10 | .65** | .14* | .20** | .33** | .15* |
| 2. Acceptance disabled |  |  | .58** | .34** | .72** | .07 | .27** | .15* | .05 | .11 | .17** | .26** | .21** | .15* | .17** |
| 3. Acceptance Roma |  |  |  | .49** | .61** | .06 | .11 | .39** | .13* | .11 | .19** | .24** | .48** | .27** | .25** |
| 4. Acceptance ethnic out-group |  |  |  |  | .32** | .11 | .00 | .16* | .28** | .03 | .37** | .02 | .33** | .61** | .10 |
| 5. Acceptance extremely poor |  |  |  |  |  | .02 | .09 | .18** | .04 | .20** | .17* | .23** | .18** | .12 | .25** |
| 6. Contact with gay-lesbian people |  |  |  |  |  |  | -.01 | .08 | .00 | .00 | .15* | .05 | .01 | .05 | .04 |
| 7. Contact with disabled |  |  |  |  |  |  |  | .24** | .05 | .18** | .14* | .01 | .09 | .08 | .08 |
| 8. Contact with Roma |  |  |  |  |  |  |  |  | .10 | .30** | .08 | .06 | .17* | .10 | .13* |
| 9. Contact with ethnic out-group |  |  |  |  |  |  |  |  |  | .00 | .07 | -.02 | .14* | .20** | .00 |
| 10. Contact with very poor |  |  |  |  |  |  |  |  |  |  | .07 | .06 | -.00 | -.01 | .17* |
| 11. Trust in gay-lesbian people |  |  |  |  |  |  |  |  |  |  |  | .13* | .32** | .53** | .14* |
| 12. Trust in people with disabilities |  |  |  |  |  |  |  |  |  |  |  |  | .29** | .16* | .62** |
| 13. Trust in Roma people |  |  |  |  |  |  |  |  |  |  |  |  |  | .61** | .38** |
| 14. Trust in ethnic out-group |  |  |  |  |  |  |  |  |  |  |  |  |  |  | .13 |
| 15. Trust in very poor people |  |  |  |  |  |  |  |  |  |  |  |  |  |  |  |
| M | 10.01 | 16.27 | 13.86 | 10.52 | 17.35 | .08 | .44 | .86 | .09 | 1.02 | 4.84 | 7.85 | 5.74 | 4.95 | 7.80 |
| SD | 5.44 | 3.71 | 4.27 | 5.24 | 3.45 | .34 | .66 | .88 | .34 | .85 | 2.26 | 1.89 | 1.90 | 2.18 | 1.83 |

* *p* < .05; ** *p* < .01

*Acceptance: on the scale from 4 (min) to 20 (max); Contact: on the scale from 0 to 3*

Table 3

*Descriptive measures and correlations among key variables in Kosovo*

|  | 1 | 2 | 3 | 4 | 5 | 6 | 7 | 8 | 9 | 10 | 11 | 12 | 13 | 14 | 15 |
| --- | --- | --- | --- | --- | --- | --- | --- | --- | --- | --- | --- | --- | --- | --- | --- |
| 1. Acceptance gay-lesbian people |  | .09 | .44** | .46** | .00 | .10 | .12 | .09 | .11 | .07 | .30** | .05 | .20** | .16* | .07 |
| 2. Acceptance disabled |  |  | .23** | .06 | .68** | .03 | .20** | -.08 | -.02 | .17* | .08 | .42** | .19** | .03 | .43** |
| 3. Acceptance Roma |  |  |  | .57** | .29** | -.04 | .08 | .30** | .16* | .23** | .19** | .20** | .39** | .23** | .23** |
| 4. Acceptance ethnic out-group |  |  |  |  | .00 | -.08 | .00 | .12 | .14* | .10 | .19** | .12 | .25** | .33** | .21** |
| 5. Acceptance extremely poor |  |  |  |  |  | .03 | .10 | .04 | -.02 | .25** | .16* | .40** | .25** | .10 | .43** |
| 6. Contact with gay-lesbian people |  |  |  |  |  |  | .13* | .05 | .15* | .02 | -.00 | -.01 | -.01 | -.03 | -.01 |
| 7. Contact with disabled |  |  |  |  |  |  |  | .30** | .46** | .26** | .13 | .11 | .14* | .06 | .11 |
| 8. Contact with Roma |  |  |  |  |  |  |  |  | .49** | .32** | .02 | .06 | .14* | .08 | .10 |
| 9. Contact with ethnic out-group |  |  |  |  |  |  |  |  |  | .27** | .08 | -.00 | .08 | .09 | .01 |
| 10. Contact with very poor |  |  |  |  |  |  |  |  |  |  | -.03 | .19** | -.00 | -.08 | .24** |
| 11. Trust in gay-lesbian people |  |  |  |  |  |  |  |  |  |  |  | .17* | .59** | .54** | .15* |
| 12. Trust in people with disabilities |  |  |  |  |  |  |  |  |  |  |  |  | .37** | .15* | .67** |
| 13. Trust in Roma people |  |  |  |  |  |  |  |  |  |  |  |  |  | .57** | .29** |
| 14. Trust in ethnic out-group |  |  |  |  |  |  |  |  |  |  |  |  |  |  | .04 |
| 15. Trust in very poor people |  |  |  |  |  |  |  |  |  |  |  |  |  |  |  |
| M | 6.97 | 14.59 | 7.90 | 6.28 | 15.82 | .01 | .16 | .13 | .02 | .52 | 4.05 | 6.95 | 4.89 | 4.00 | 7.52 |
| SD | 3.58 | 4.35 | 3.71 | 3.08 | 4.24 | .11 | .43 | .41 | .23 | .64 | 1.98 | 1.97 | 2.00 | 2.06 | 2.02 |

* *p* < .05; ** *p* < .01

*Acceptance: on the scale from 4 (min) to 20 (max); Contact: on the scale from 0 to 3*

Table 4

*Descriptive measures and correlations among key variables in Macedonia*

|  | 1 | 2 | 3 | 4 | 5 | 6 | 7 | 8 | 9 | 10 | 11 | 12 | 13 | 14 | 15 |
| --- | --- | --- | --- | --- | --- | --- | --- | --- | --- | --- | --- | --- | --- | --- | --- |
| 1. Acceptance gay-lesbian people |  | .366** | .424** | .442** | .265** | .224** | .042 | .034 | .080 | .008 | .668** | .121 | .281** | .219** | .097 |
| 2. Acceptance disabled |  |  | .478** | .331** | .587** | .065 | .022 | -.040 | .082 | .134 | .263** | .258** | .224** | .057 | .063 |
| 3. Acceptance Roma |  |  |  | .429** | .274** | -.005 | .084 | .173* | .052 | .082 | .332** | .189** | .582** | .314** | .073 |
| 4. Acceptance ethnic out-group |  |  |  |  | .207** | .123 | -.039 | -.034 | .441** | .095 | .364** | .062 | .307** | .422** | .084 |
| 5. Acceptance extremely poor |  |  |  |  |  | .039 | -.069 | -.007 | .086 | .041 | .143* | .086 | .064 | -.035 | .090 |
| 6. Contact with gay-lesbian people |  |  |  |  |  |  | .171* | .160* | .142* | .110 | .131 | .057 | .030 | .059 | -.002 |
| 7. Contact with disabled |  |  |  |  |  |  |  | .401** | .115 | .209** | -.028 | .064 | .062 | .113 | .060 |
| 8. Contact with Roma |  |  |  |  |  |  |  |  | .209** | .227** | -.043 | .014 | .139* | .071 | .050 |
| 9. Contact with ethnic out-group |  |  |  |  |  |  |  |  |  | .221** | .044 | -.042 | .105 | .317** | -.039 |
| 10. Contact with very poor |  |  |  |  |  |  |  |  |  |  | -.030 | .054 | .056 | .065 | -.006 |
| 11. Trust in gay-lesbian people |  |  |  |  |  |  |  |  |  |  |  | .199** | .422** | .411** | .117 |
| 12. Trust in people with disabilities |  |  |  |  |  |  |  |  |  |  |  |  | .198** | .106 | .389** |
| 13. Trust in Roma people |  |  |  |  |  |  |  |  |  |  |  |  |  | .625** | .055 |
| 14. Trust in ethnic out-group |  |  |  |  |  |  |  |  |  |  |  |  |  |  | .023 |
| 15. Trust in very poor people |  |  |  |  |  |  |  |  |  |  |  |  |  |  |  |
| M | 9.61 | 15.82 | 12.01 | 10.81 | 17.41 | .09 | .37 | .66 | .70 | 1.10 | 4.47 | 6.36 | 5.11 | 4.89 | 7.06 |
| SD | 5.27 | 3.48 | 4.17 | 4.69 | 2.87 | .30 | .54 | .82 | .96 | .99 | 2.15 | 1.66 | 1.99 | 2.14 | 1.78 |

* *p* < .05; ** *p* < .01

*Acceptance: on the scale from 4 (min) to 20 (max); Contact: on the scale from 0 to 3*

Table 5

*Descriptive measures and correlations among key variables in Bosnia and Herzegovina*

|  | 1 | 2 | 3 | 4 | 5 | 6 | 7 | 8 | 9 | 10 | 11 | 12 | 13 | 14 | 15 |
| --- | --- | --- | --- | --- | --- | --- | --- | --- | --- | --- | --- | --- | --- | --- | --- |
| 1. Acceptance gay-lesbian people |  | .38** | .35** | .32** | .32** | .01 | .17* | .09 | .12 | .12 | .58** | .20** | .24** | .28** | .14* |
| 2. Acceptance disabled |  |  | .53** | .39** | .74** | -.25** | .04 | .01 | .04 | .06 | .17* | .15* | .19** | .14* | .24** |
| 3. Acceptance Roma |  |  |  | .59** | .51** | -.21** | .14* | .20** | .13 | .08 | .16* | .18** | .28** | .29** | .16* |
| 4. Acceptance ethnic out-group |  |  |  |  | .41** | -.02 | .10 | .11 | .25** | .02 | .11 | .10 | .17* | .37** | .13 |
| 5. Acceptance extremely poor |  |  |  |  |  | -.15* | .08 | .03 | .08 | .09 | .15* | .15* | .17** | .13 | .29** |
| 6. Contact with gay-lesbian people |  |  |  |  |  |  | .25** | .11 | .11 | .10 | .02 | -.02 | -.05 | -.09 | -.05 |
| 7. Contact with disabled |  |  |  |  |  |  |  | .32** | .20** | .41** | .20** | .10 | .17* | .05 | .15* |
| 8. Contact with Roma |  |  |  |  |  |  |  |  | .10 | .22** | .11 | .02 | .12 | .09 | .08 |
| 9. Contact with ethnic out-group |  |  |  |  |  |  |  |  |  | .05 | .15* | .10 | .12 | .22** | .12 |
| 10. Contact with very poor |  |  |  |  |  |  |  |  |  |  | .15* | .09 | .06 | .03 | .08 |
| 11. Trust in gay-lesbian people |  |  |  |  |  |  |  |  |  |  |  | .31** | .43** | .46** | .34** |
| 12. Trust in people with disabilities |  |  |  |  |  |  |  |  |  |  |  |  | .41** | .47** | .57** |
| 13. Trust in Roma people |  |  |  |  |  |  |  |  |  |  |  |  |  | .70** | .46** |
| 14. Trust in ethnic out-group |  |  |  |  |  |  |  |  |  |  |  |  |  |  | .43** |
| 15. Trust in very poor people |  |  |  |  |  |  |  |  |  |  |  |  |  |  |  |
| M | 11.22 | 16.82 | 14.31 | 14.09 | 17.57 | .11 | .59 | .37 | .10 | 1.17 | 4.96 | 7.85 | 6.11 | 6.20 | 7.79 |
| SD | 5.83 | 3.53 | 4.40 | 4.76 | 3.24 | .40 | .65 | .65 | .35 | .99 | 2.40 | 1.80 | 2.11 | 2.19 | 1.92 |

* *p* < .05; ** *p* < .01

*Acceptance: on the scale from 4 (min) to 20 (max); Contact: on the scale from 0 to 3*
